# Supplementary material for: Functional Network of the Long Non-coding RNA Growth Arrest-Specific Transcript 5 and Its Interacting Proteins in Senescence
Source: Front Genet. 2021 Mar 10;12:615340. doi: 10.3389/fgene.2021.615340 (PMC7987947; doi:10.3389/fgene.2021.615340)
Supplement: Supplementary Table 1 — The sequence of RT-qPCR primer for mouse GAS5. [file Table_1.XLSX]

## Sheet: Supplementary table 1
Supplementary table S1. The sequence of RT-qPCR primer for mouse GAS5
Gene	Primer sequence (5'-3')
GAPDH forward	TCAACAGCAACTCCCACTCTTCCA
GAPDH reverse	ACCCTGTTGCTGTAGCCGTATTCA
lncRNA-GAS5-234-forward	GTGGGATCTCACAGCCAGTTC
lncRNA-GAS5-234-reverse	CTCGCTCTGTTATCCAGCTTC
lncRNA-GAS5-456-forward	GGAGGATGAAGGCTTACGAGG
lncRNA-GAS5-456-reverse	TTTCTGGTCTTCTATTCTAGCACAT

## Sheet: Supplementary table 2
Supplementary table 2. The expression level, log2FoldChange and adjusted P values of 58 DEGs.
Gene ID	Annotation	baseMean	log2FoldChange	lfcSE	stat	pvalue	padj
ENSMUSG00000089764	predicted gene 16580 [Source:MGI Symbol;Acc:MGI:4415000]	40.1043	-1.12304	0.572898	-1.96027	0.0499638	0.99983
ENSMUSG00000109032	predicted gene 7972 [Source:MGI Symbol;Acc:MGI:3647337]	18.0937	-1.68506	0.854088	-1.97294	0.0485028	0.99983
ENSMUSG00000004988	FXYD domain-containing ion transport regulator 4 [Source:MGI Symbol;Acc:MGI:1889005]	11.4257	-2.21889	1.12443	-1.97334	0.0484571	0.99983
ENSMUSG00000053049	predicted gene 15413 [Source:MGI Symbol;Acc:MGI:3642665]	11.7567	2.35132	1.19146	1.97348	0.0484411	0.99983
ENSMUSG00000087480	predicted gene 15910 [Source:MGI Symbol;Acc:MGI:3802158]	38.8299	-1.23083	0.612479	-2.00958	0.0444754	0.99983
ENSMUSG00000101191	predicted gene 28809 [Source:MGI Symbol;Acc:MGI:5579515]	44.6768	1.10876	0.551154	2.0117	0.0442516	0.99983
ENSMUSG00000066443	predicted pseudogene 10163 [Source:MGI Symbol;Acc:MGI:3704341]	49.1004	1.04544	0.519389	2.01283	0.0441324	0.99983
ENSMUSG00000102899	predicted gene, 37850 [Source:MGI Symbol;Acc:MGI:5611078]	27.5067	-1.39617	0.69231	-2.01668	0.043729	0.99983
ENSMUSG00000099998	predicted gene 6501 [Source:MGI Symbol;Acc:MGI:3645570]	18.8552	-1.76502	0.873798	-2.01994	0.0433892	0.99983
ENSMUSG00000105356	predicted gene 42603 [Source:MGI Symbol;Acc:MGI:5662740]	18.3876	-1.83037	0.904853	-2.02284	0.04309	0.99983
ENSMUSG00000052396	monoacylglycerol O-acyltransferase 2 [Source:MGI Symbol;Acc:MGI:2663253]	33.9212	1.27404	0.62818	2.02815	0.0425453	0.99983
ENSMUSG00000051076	V-set domain containing T cell activation inhibitor 1 [Source:MGI Symbol;Acc:MGI:3039619]	37.2209	1.2636	0.622574	2.02965	0.0423926	0.99983
ENSMUSG00000061482	H4 clustered histone 4 [Source:MGI Symbol;Acc:MGI:2448423]	24.7736	1.53462	0.747423	2.05322	0.0400516	0.99983
ENSMUSG00000078664	small proline-rich protein 2A1 [Source:MGI Symbol;Acc:MGI:1330350]	19.7578	1.70991	0.831727	2.05585	0.0397969	0.99983
ENSMUSG00000103409	leucine-rich single-pass membrane protein 2 [Source:MGI Symbol;Acc:MGI:3612240]	49.005	-1.15979	0.562265	-2.06271	0.0391404	0.99983
ENSMUSG00000039155	cadherin-like 26 [Source:MGI Symbol;Acc:MGI:2685856]	33.1372	-1.5765	0.762065	-2.06872	0.0385723	0.99983
ENSMUSG00000080888	predicted gene 14387 [Source:MGI Symbol;Acc:MGI:3650318]	20.1914	-1.68362	0.811726	-2.07412	0.0380679	0.99983
ENSMUSG00000109438	predicted gene 45073 [Source:MGI Symbol;Acc:MGI:5753649]	15.1572	-2.00032	0.958771	-2.08634	0.0369481	0.99983
ENSMUSG00000020638	cytidine monophosphate (UMP-CMP) kinase 2, mitochondrial [Source:MGI Symbol;Acc:MGI:99830]	18.6809	-1.97876	0.946725	-2.09011	0.036608	0.99983
ENSMUSG00000098024	predicted gene, 27003 [Source:MGI Symbol;Acc:MGI:5504118]	30.7644	-1.36964	0.654489	-2.09268	0.0363775	0.99983
ENSMUSG00000112847	predicted gene, 47573 [Source:MGI Symbol;Acc:MGI:6096604]	25.4508	1.60678	0.766174	2.09714	0.0359807	0.99983
ENSMUSG00000091345	collagen, type VI, alpha 5 [Source:MGI Symbol;Acc:MGI:3648134]	17.8576	-1.89597	0.890871	-2.12822	0.0333186	0.99983
ENSMUSG00000101355	H3 clustered histone 10 [Source:MGI Symbol;Acc:MGI:2448349]	13.5925	2.16519	1.01224	2.13901	0.0324347	0.99983
ENSMUSG00000041119	phosphodiesterase 9A [Source:MGI Symbol;Acc:MGI:1277179]	21.0234	1.72599	0.80635	2.14049	0.0323149	0.99983
ENSMUSG00000097576	RIKEN cDNA D930030I03 gene [Source:MGI Symbol;Acc:MGI:2444245]	31.3156	1.40154	0.649438	2.15809	0.030921	0.99983
ENSMUSG00000016028	cadherin, EGF LAG seven-pass G-type receptor 1 [Source:MGI Symbol;Acc:MGI:1100883]	13.3765	2.30352	1.0601	2.17292	0.0297863	0.99983
ENSMUSG00000070034	Sp110 nuclear body protein [Source:MGI Symbol;Acc:MGI:1923364]	52.4441	1.14477	0.525726	2.1775	0.0294432	0.99983
ENSMUSG00000109372	predicted gene, 19410 [Source:MGI Symbol;Acc:MGI:5011595]	43.514	1.62528	0.740563	2.19465	0.0281886	0.99983
ENSMUSG00000098176	coiled-coil domain containing 166 [Source:MGI Symbol;Acc:MGI:1925902]	20.3207	1.84738	0.840435	2.19812	0.0279406	0.99983
ENSMUSG00000110575	RIKEN cDNA 6330537M06 gene [Source:MGI Symbol;Acc:MGI:1923413]	60.4478	-1.04902	0.473763	-2.21423	0.0268129	0.99983
ENSMUSG00000102970	predicted gene, 37349 [Source:MGI Symbol;Acc:MGI:5610577]	12.3915	-2.36007	1.0625	-2.22124	0.0263344	0.99983
ENSMUSG00000069300	H2B clustered histone 11 [Source:MGI Symbol;Acc:MGI:2448388]	25.5726	1.58597	0.713525	2.22272	0.0262346	0.99983
ENSMUSG00000095493	RIKEN cDNA A630023A22 gene [Source:MGI Symbol;Acc:MGI:2145657]	28.7529	1.63184	0.733334	2.22523	0.0260657	0.99983
ENSMUSG00000087242	expressed sequence C78197 [Source:MGI Symbol;Acc:MGI:2144636]	13.9392	-2.36233	1.05427	-2.24072	0.0250439	0.99983
ENSMUSG00000055333	FAT atypical cadherin 2 [Source:MGI Symbol;Acc:MGI:2685369]	41.0725	1.4064	0.620856	2.26526	0.0234969	0.99983
ENSMUSG00000091900	predicted gene 4353 [Source:MGI Symbol;Acc:MGI:3782538]	40.8434	-1.80238	0.786813	-2.29073	0.0219789	0.99983
ENSMUSG00000032690	2'-5' oligoadenylate synthetase 2 [Source:MGI Symbol;Acc:MGI:2180852]	60.5833	-1.22448	0.530635	-2.30757	0.0210232	0.99983
ENSMUSG00000089936	predicted gene 16199 [Source:MGI Symbol;Acc:MGI:3801797]	56.8979	1.11018	0.48022	2.3118	0.0207885	0.99983
ENSMUSG00000025938	solute carrier organic anion transporter family, member 5A1 [Source:MGI Symbol;Acc:MGI:2443431]	35.5421	1.55938	0.666666	2.33907	0.0193318	0.99983
ENSMUSG00000038591	collectin sub-family member 10 [Source:MGI Symbol;Acc:MGI:3606482]	14.9494	-2.29785	0.980526	-2.34348	0.0191046	0.99983
ENSMUSG00000027514	Z-DNA binding protein 1 [Source:MGI Symbol;Acc:MGI:1927449]	75.6528	-1.06481	0.448412	-2.37463	0.0175665	0.99983
ENSMUSG00000094973	eukaryotic translation initiation factor 4A3 like 1 [Source:MGI Symbol;Acc:MGI:3644226]	20.211	2.37183	0.987486	2.40189	0.0163108	0.99983
ENSMUSG00000026609	usherin [Source:MGI Symbol;Acc:MGI:1341292]	38.7997	1.52805	0.630635	2.42303	0.0153915	0.99983
ENSMUSG00000107000	predicted gene 43481 [Source:MGI Symbol;Acc:MGI:5663618]	68.4909	-1.209	0.494661	-2.44409	0.0145217	0.99983
ENSMUSG00000031438	ring finger protein 128 [Source:MGI Symbol;Acc:MGI:1914139]	31.1087	2.04145	0.827327	2.46753	0.0136049	0.99983
ENSMUSG00000115684	predicted gene 6087 [Source:MGI Symbol;Acc:MGI:3644467]	36.0213	1.52669	0.616333	2.47705	0.0132474	0.99983
ENSMUSG00000062873	olfactory receptor 1355 [Source:MGI Symbol;Acc:MGI:3031189]	32.4067	-1.59085	0.63755	-2.49526	0.0125865	0.99983
ENSMUSG00000086468	Ewing tumor-associated antigen 1, opposite strand [Source:MGI Symbol;Acc:MGI:1920221]	11.5403	-3.02317	1.20206	-2.515	0.0119033	0.99983
ENSMUSG00000091449	predicted gene 10269 [Source:MGI Symbol;Acc:MGI:3642381]	17.5199	-2.2584	0.890516	-2.53605	0.011211	0.99983
ENSMUSG00000098470	complement component 1, r subcomponent B [Source:MGI Symbol;Acc:MGI:3779804]	65.3147	1.46565	0.567673	2.58186	0.00982682	0.99983
ENSMUSG00000041809	EF-hand domain (C-terminal) containing 1 [Source:MGI Symbol;Acc:MGI:1919127]	45.772	1.54661	0.586184	2.63843	0.00832911	0.99983
ENSMUSG00000094103	family with sequence similarity 177 member A2 [Source:MGI Symbol;Acc:MGI:3714351]	88.7066	1.42309	0.533881	2.66556	0.00768611	0.99983
ENSMUSG00000112822	RIKEN cDNA A130012E19 gene [Source:MGI Symbol;Acc:MGI:2443640]	16.9211	-2.51054	0.935611	-2.68331	0.00728963	0.99983
ENSMUSG00000021010	neuronal PAS domain protein 3 [Source:MGI Symbol;Acc:MGI:1351610]	43.6858	-1.55425	0.579171	-2.68357	0.00728402	0.99983
ENSMUSG00000068762	glutathione S-transferase, mu 6 [Source:MGI Symbol;Acc:MGI:1309467]	28.3561	2.00881	0.704418	2.85173	0.00434822	0.99983
ENSMUSG00000027750	periostin, osteoblast specific factor [Source:MGI Symbol;Acc:MGI:1926321]	114.375	-1.33089	0.449831	-2.95865	0.00308991	0.99983
ENSMUSG00000072494	protein phosphatase 1, regulatory subunit 3E [Source:MGI Symbol;Acc:MGI:2145790]	64.1443	-1.4238	0.459796	-3.09658	0.00195766	0.99983
ENSMUSG00000109903	predicted gene 28710 [Source:MGI Symbol;Acc:MGI:5579416]	37.2275	1.94479	0.626513	3.10415	0.00190824	0.99983

## Sheet: Supplementary table 3
Supplementary table 3. The detailed information of GO terms showed in figure 3C.
Category	Term	Count	%	PValue	Genes	List Total	Pop Hits	Pop Total	Fold Enrichment	Bonferroni	Benjamini	FDR
GOTERM_BP_FAT	GO:0006334~nucleosome assembly	3	13.6364	0.00420213	ENSMUSG00000069300, ENSMUSG00000061482, ENSMUSG00000101355	16	117	17911	28.7035	0.888051	0.888051	5.91525
GOTERM_BP_FAT	GO:0031497~chromatin assembly	3	13.6364	0.00563266	ENSMUSG00000069300, ENSMUSG00000061482, ENSMUSG00000101355	16	136	17911	24.6935	0.946989	0.76976	7.85349
GOTERM_BP_FAT	GO:0034728~nucleosome organization	3	13.6364	0.00620866	ENSMUSG00000069300, ENSMUSG00000061482, ENSMUSG00000101355	16	143	17911	23.4847	0.96078	0.660242	8.62337
GOTERM_BP_FAT	GO:0006333~chromatin assembly or disassembly	3	13.6364	0.00752984	ENSMUSG00000069300, ENSMUSG00000061482, ENSMUSG00000101355	16	158	17911	21.2551	0.980363	0.625657	10.3667
GOTERM_BP_FAT	GO:0006323~DNA packaging	3	13.6364	0.00906717	ENSMUSG00000069300, ENSMUSG00000061482, ENSMUSG00000101355	16	174	17911	19.3006	0.99123	0.612208	12.3562
GOTERM_BP_FAT	GO:0065004~protein-DNA complex assembly	3	13.6364	0.00936988	ENSMUSG00000069300, ENSMUSG00000061482, ENSMUSG00000101355	16	177	17911	18.9735	0.992518	0.557752	12.7431
GOTERM_BP_FAT	GO:0071824~protein-DNA complex subunit organization	3	13.6364	0.0121801	ENSMUSG00000069300, ENSMUSG00000061482, ENSMUSG00000101355	16	203	17911	16.5434	0.998292	0.597621	16.2596
GOTERM_BP_FAT	GO:0071103~DNA conformation change	3	13.6364	0.0129928	ENSMUSG00000069300, ENSMUSG00000061482, ENSMUSG00000101355	16	210	17911	15.992	0.998887	0.572614	17.2517
GOTERM_BP_FAT	GO:0006335~DNA replication-dependent nucleosome assembly	2	9.09091	0.0272936	ENSMUSG00000061482, ENSMUSG00000101355	16	33	17911	67.8447	0.999999	0.797878	33.0149
GOTERM_BP_FAT	GO:0034723~DNA replication-dependent nucleosome organization	2	9.09091	0.0272936	ENSMUSG00000061482, ENSMUSG00000101355	16	33	17911	67.8447	0.999999	0.797878	33.0149
GOTERM_BP_FAT	GO:0008544~epidermis development	3	13.6364	0.027837	ENSMUSG00000016028, ENSMUSG00000078664, ENSMUSG00000026609	16	315	17911	10.6613	1	0.769627	33.5547
GOTERM_BP_FAT	GO:0032776~DNA methylation on cytosine	2	9.09091	0.0289252	ENSMUSG00000061482, ENSMUSG00000101355	16	35	17911	63.9679	1	0.750311	34.6235
GOTERM_BP_FAT	GO:0051290~protein heterotetramerization	2	9.09091	0.0386613	ENSMUSG00000061482, ENSMUSG00000101355	16	47	17911	47.6356	1	0.818875	43.4993
GOTERM_BP_FAT	GO:0045815~positive regulation of gene expression, epigenetic	2	9.09091	0.042691	ENSMUSG00000061482, ENSMUSG00000101355	16	52	17911	43.0553	1	0.825383	46.8335
GOTERM_BP_FAT	GO:0000183~chromatin silencing at rDNA	2	9.09091	0.0475059	ENSMUSG00000061482, ENSMUSG00000101355	16	58	17911	38.6013	1	0.835984	50.5769
GOTERM_BP_FAT	GO:0051707~response to other organism	4	18.1818	0.0510077	ENSMUSG00000051076, ENSMUSG00000070034, ENSMUSG00000069300, ENSMUSG00000101355	16	1027	17911	4.36003	1	0.837155	53.1437
GOTERM_BP_FAT	GO:0043207~response to external biotic stimulus	4	18.1818	0.0511311	ENSMUSG00000051076, ENSMUSG00000070034, ENSMUSG00000069300, ENSMUSG00000101355	16	1028	17911	4.35579	1	0.818364	53.2318
GOTERM_BP_FAT	GO:0009607~response to biotic stimulus	4	18.1818	0.0582833	ENSMUSG00000051076, ENSMUSG00000070034, ENSMUSG00000069300, ENSMUSG00000101355	16	1084	17911	4.13077	1	0.840681	58.0849
GOTERM_BP_FAT	GO:0098609~cell-cell adhesion	4	18.1818	0.0605477	ENSMUSG00000051076, ENSMUSG00000055333, ENSMUSG00000016028, ENSMUSG00000101355	16	1101	17911	4.06698	1	0.835419	59.5209
GOTERM_BP_FAT	GO:0006306~DNA methylation	2	9.09091	0.0641806	ENSMUSG00000061482, ENSMUSG00000101355	16	79	17911	28.3402	1	0.837231	61.7293
GOTERM_BP_FAT	GO:0006305~DNA alkylation	2	9.09091	0.0641806	ENSMUSG00000061482, ENSMUSG00000101355	16	79	17911	28.3402	1	0.837231	61.7293
GOTERM_BP_FAT	GO:0044728~DNA methylation or demethylation	2	9.09091	0.0735863	ENSMUSG00000061482, ENSMUSG00000101355	16	91	17911	24.603	1	0.862934	66.937
GOTERM_BP_FAT	GO:0006955~immune response	4	18.1818	0.0795643	ENSMUSG00000051076, ENSMUSG00000070034, ENSMUSG00000069300, ENSMUSG00000098470	16	1233	17911	3.63159	1	0.871646	69.8955
GOTERM_BP_FAT	GO:0006304~DNA modification	2	9.09091	0.0805825	ENSMUSG00000061482, ENSMUSG00000101355	16	100	17911	22.3887	1	0.862731	70.3741
GOTERM_BP_FAT	GO:0002682~regulation of immune system process	4	18.1818	0.0820372	ENSMUSG00000051076, ENSMUSG00000061482, ENSMUSG00000101355, ENSMUSG00000098470	16	1249	17911	3.58507	1	0.855614	71.0456
GOTERM_BP_FAT	GO:0045087~innate immune response	3	13.6364	0.0992908	ENSMUSG00000070034, ENSMUSG00000069300, ENSMUSG00000098470	16	643	17911	5.22288	1	0.896247	78.0015

## Sheet: Supplementary table 4
Supplementary table 4. The detailed information of identified proteins in RNA pull down experiment.
Accession	Exp. q-value: Combined	Coverage [%]	# Peptides	# Unique Peptides	MW [kDa]
Q9CWF2	0	76	34	1	49.9
Q91XM9	0	61	47	40	94.8
Q5DU25	0	41	48	43	161.7
Q8C0T5	0	35	42	42	196.9
Q8BL65	0	52	24	23	68.1
Q5SYD0	0	43	37	36	116
Q8BKX1	0	55	27	27	59.2
Q62417	0	32	36	35	143
Q9Z2Y3	0	58	22	21	41.4
A2AQ25	0	22	33	33	212.9
Q7TMB8	0	24	27	6	145.1
P59281	0	31	27	27	125.1
Q6PHZ2	0	44	21	12	56.3
P07901	0	38	27	15	84.7
Q8BSS9	0	29	28	27	143.1
P63087	0	63	19	3	37
Q9D415	0	28	23	22	110.3
Q9WV69	0	50	16	15	45.4
Q9EQZ6	0	28	24	24	115.4
B1AZP2	0	28	18	16	108
Q6NS60	0	33	21	21	94.3
O08917	0	60	21	21	47.5
Q8BVE3	0	51	21	21	55.8
Q0KL02	0	10	26	17	347.6
Q8BIZ1	0	14	17	17	139
Q9QZQ8	0	45	14	13	39.7
Q8BH44	0	41	18	18	54.9
Q64487	0	13	18	12	214.3
Q99MI1	0	21	24	12	128.3
Q60737	0	49	16	14	45.1
Q6A065	0	16	18	17	174.9
Q64331	0	21	21	21	146.3
Q80UG5	0	37	18	18	65.5
B2RSH2	0	40	13	7	40.3
A2AHG0	0	31	16	16	74.9
A2AGT5	0	13	21	21	225.5
Q9WUM4	0	27	12	12	53.1
Q60634	0	43	15	15	47
Q925I1	0	36	19	19	66.7
Q80U49	0	17	20	19	170.7
Q8K1M6	0	26	13	13	82.6
Q80TV8	0	14	17	13	169.1
Q9ES28	0	22	15	15	97
O70589	0	24	19	19	105
Q80TJ1	0	16	17	17	153
O08788	0	18	16	16	141.6
Q3UNH4	0	25	17	17	95.4
P63044	0	35	5	4	12.7
Q6NS52	0	21	12	11	90.2
O54931	0	22	16	16	98.5
P63082	0	32	2	2	15.8
Q9EQH3	0	19	12	12	91.7
P30999	0	23	15	15	104.9
Q9Z1L5	0	14	12	12	122.7
Q80U40	0	19	11	11	118.3
Q9Z0E0	0	21	14	14	78.8
P46097	0	13	7	1	47.2
Q62167	0	26	14	13	73.1
Q9JJK2	0	23	8	8	50.7
Q9WTS5	0	6	10	10	306.3
Q9DB05	0	31	7	5	33.2
Q9WV02	0	29	12	2	42.3
Q8BUV3	0	20	11	11	83.2
P27546	0	13	10	10	117.4
Q80U23	0	24	10	10	53.7
Q5DTY9	0	26	13	10	48.9
Q2M3X8	0	30	14	14	66.2
P55288	0	21	10	10	88.1
Q3TES0	0	11	9	8	129
O08539	0	15	8	6	64.4
Q5SSL4	0	16	11	10	97.6
Q8R361	0	18	8	8	69.5
O54829	0	20	7	7	54.8
Q7TQD2	0	34	6	6	23.6
Q61768	0	10	8	2	109.5
P63037	0	20	7	7	44.8
Q80TZ3	0	11	9	9	102.2
Q5DQR4	0	9	5	5	131.8
Q9WV18	0	12	10	10	108.1
Q922S4	0	11	7	7	105.6
Q80XN0	0	25	7	7	38.3
Q02357	0	4	9	2	204.1
Q925N0	0	28	8	8	37.3
Q9D2N4	0	11	6	6	84
Q8CFI0	0	12	11	11	115.3
Q6R0H7	0	9	10	9	121.4
Q9R0N5	0	9	4	1	43.1
Q8CHT1	0	13	8	8	82.1
Q6PAJ1	0	11	10	9	143
Q3UHC7	0	8	9	5	131.6
Q9Z2X1	0	17	5	3	45.7
Q60902	0	10	7	7	99.2
P54285	0	20	9	4	54.5
Q9Z0R4	0	5	6	4	194.2
O08810	0	12	9	9	109.3
P63141	0	16	6	2	56.7
Q9WTI7	0	7	6	6	121.9
Q6P1F6	0	15	5	4	51.7
P27671	0	7	8	6	144
Q9Z2I0	0	12	7	7	82.9
Q8JZS0	0	28	5	5	26
P15864	0	20	8	3	21.3
P16388	0	13	5	1	56.4
Q9D394	0	13	5	5	53
Q9R1R2	0	8	5	5	80.7
D3YXK2	0	6	4	4	105
Q8CC27	0	14	8	3	73.1
Q8C729	0	16	8	8	58.6
Q80U19	0	6	6	6	128.3
Q69ZK9	0	6	4	3	90.9
Q62059	0	2	6	6	366.6
Q9Z351	0	7	4	4	84.4
Q9EPU0	0	6	5	5	123.9
Q8R3S6	0	8	6	5	101.8
P04925	0	17	4	4	28
Q8BL97	0	16	4	3	30.8
Q9CZW4	0	8	4	4	80.4
P07744	0	8	5	1	56.2
Q6ZQ18	0	9	6	5	92.3
P31938	0	10	4	4	43.4
Q9CR68	0	11	3	3	29.3
P55258	0	21	4	1	23.7
Q99NB9	0	5	5	5	145.7
Q80U28	0	4	5	5	175.1
O70503	0	18	4	4	34.7
Q91WK0	0	8	3	2	47.1
Q6PDM2	0	23	5	5	27.7
Q6P4T2	0	4	7	7	244.4
Q91XY4	0	3	2	2	100.3
Q7M6Y3	0	6	3	1	71.5
P53986	0	10	3	3	53.2
Q0VE82	0	6	3	2	61.9
Q99L43	0	11	3	3	51.3
Q8R4U7	0	4	3	3	119.2
Q9R1C6	0	6	3	3	63.6
P10630	0	10	4	1	46.4
Q9R1L5	0	2	3	1	170.9
Q14BI2	0	6	5	3	95.8
Q60900	0	8	2	1	39.5
O88910	0	3	1	1	64.4
Q6PDH0	0	2	2	2	150
P25976	0	4	2	2	89.5
P62702	0	15	5	5	29.6
P56135	0	26	2	2	10.3
Q91WS0	0	14	1	1	12.1
Q50H33	0	7	4	1	52.7
P58854	0	3	2	2	103.4
Q6PAK3	0	7	2	2	45.2
Q61423	0	7	3	2	73.4
Q3UM45	0	5	1	1	41.3
Q91VC3	0	11	5	4	46.8
P62192	0	5	1	1	49.2
P23116	0	2	2	2	161.8
P39087	0	3	2	2	102.4
Q61584	0	5	3	2	76.2
P62911	0	25	3	3	15.9
Q91Y86	0	11	4	1	44.2
Q5U458	0	4	2	2	63.2
Q9DCW4	0	13	3	3	27.6
P56959	0	4	2	2	52.6
P0C0A3	0	7	1	1	23.4
Q9D7G0	0	8	2	2	34.8
Q9QX11	0	10	3	1	46.2
Q5SUA5	0	3	2	1	117.2
Q61081	0	4	1	1	44.6
Q9JM63	0	5	1	1	42.4
O35344	0	5	2	2	57.7
Q6A0A9	0	2	1	1	121.6
P46467	0	5	2	2	49.4
P54227	0	15	2	2	17.3
O55022	0	11	2	2	21.7
Q9Z2A0	0	3	1	1	63.7
P18052	0.001	3	2	2	93.6
Q9CQ69	0.001	16	1	1	9.8
Q62048	0.001	15	1	1	15
Q61016	0.001	24	1	1	7.5
Q8K3I4	0.001	1	1	1	94.9
O55126	0.001	9	2	1	32.9
P45376	0.001	4	1	1	35.7
Q8K4Z0	0.001	4	2	2	63
O55100	0.001	5	1	1	25.6
Q8BK64	0.001	7	1	1	38.1
Q9Z2U1	0.001	8	1	1	26.4
Q9CQM9	0.001	4	1	1	37.8
P62245	0.001	11	1	1	14.8
P62071	0.001	6	1	1	23.4
Q62442	0.001	20	2	1	12.9
P70372	0.001	6	2	2	36.1
P59108	0.001	4	2	1	61
Q9QZM0	0.001	2	1	1	67.3
Q5SSZ5	0.001	1	1	1	155.5
P11881	0.001	0	1	1	313
Q9D4H9	0.001	2	1	1	99
Q64133	0.001	3	1	1	59.6
Q62318	0.001	3	2	2	88.8
Q6I6G8	0.001	1	1	1	176.1
Q91VE0	0.001	5	2	2	72.3
P70349	0.001	11	1	1	13.8
P12815	0.001	5	1	1	21.9
P19096	0.001	1	2	2	272.3
Q9WV60	0.001	5	2	2	46.7
Q3UHB1	0.001	2	1	1	63.1
Q9CR67	0.001	5	1	1	28
P62743	0.001	13	2	2	17
Q9QYF9	0.001	6	2	1	41.5
Q8BYC6	0.001	2	2	1	105.3
O54916	0.002	1	1	1	86.5
P62320	0.002	8	1	1	13.9
Q9JHI5	0.002	3	1	1	46.3
P97370	0.002	6	1	1	31.8
Q6X893	0.002	2	1	1	73
P63325	0.002	5	1	1	18.9
Q9WUK2	0.002	9	1	1	27.3
Q8C754	0.002	3	1	1	82
Q8R2V5	0.002	3	1	1	44
Q9QYA2	0.002	4	1	1	37.9
Q8BXR9	0.002	1	1	1	108.9
P36916	0.002	2	1	1	68.7
Q60936	0.002	2	1	1	71.7
Q91YJ2	0.002	2	1	1	51.7
Q9D710	0.002	4	1	1	33.9
Q9R0U0	0.002	4	1	1	31.3
P98086	0.003	6	1	1	26
S4R1M9	0.003	1	1	1	83.8
Q99LH2	0.003	3	1	1	55.6
Q3V0K9	0.003	1	1	1	70.4
Q9D1E8	0.003	3	1	1	42.2
Q80Y17	0.003	1	1	1	112.5
Q9CR16	0.003	2	1	1	40.7
Q8CGR5	0.003	9	1	1	27
Q11136	0.003	4	1	1	55
O08579	0.003	9	1	1	29.4
P51660	0.003	2	1	1	79.4
Q99L45	0.003	4	1	1	38.1
Q9D024	0.003	4	1	1	55.8
Q6P9S0	0.003	2	1	1	76.8
Q9JI19	0.003	3	1	1	41.2
Q8BNY6	0.003	6	1	1	21.9
Q8C0V0	0.003	2	2	1	86.6
Q9Z2U0	0.003	4	1	1	27.8
Q9D0M1	0.003	4	1	1	39.4
Q9QXY1	0.003	2	2	1	99.3
Q8CFV4	0.003	11	1	1	15.3
Q9D662	0.003	1	1	1	86.4
Q9D855	0.003	7	1	1	13.5
O08842	0.003	2	1	1	51.7
Q80U35	0.004	1	1	1	221.5
Q8K3K8	0.004	3	1	1	67
P61022	0.004	8	1	1	22.4
Q6PDK2	0.004	1	1	1	599.9
A2BDX3	0.004	5	2	2	49.3
Q8CHX7	0.004	4	1	1	54.9
Q3TRR0	0.004	2	1	1	73.5
Q99K28	0.004	2	1	1	56.6
P47915	0.004	5	1	1	17.6
Q9CPV4	0.004	6	1	1	33.3
Q6GYP7	0.004	1	2	1	229.2
Q8BMF3	0.004	2	1	1	67.1
P47955	0.004	14	1	1	11.5
Q7M757	0.004	3	1	1	33.1
P35294	0.004	5	1	1	24.4
Q9CYZ2	0.004	4	1	1	24
Q80SY4	0.004	1	1	1	110
Q3THK7	0.005	2	1	1	76.7
Q8VBX6	0.006	1	1	1	218.6
O08848	0.007	2	1	1	60.1
Q921G8	0.007	2	1	1	103.2
Q8BW41	0.007	2	1	1	69.3
Q8K268	0.007	2	1	1	79.8
P35293	0.007	5	1	1	23
P11404	0.007	7	1	1	14.8
P97772	0.008	1	2	1	133.1
Q6PGE7	0.008	1	1	1	71
Q9Z2T6	0	6	4	1	55.7
Q9DBR1	0	7	4	4	108.6
P57776	0	13	2	2	31.3
Q91YT7	0	6	3	1	62.2
P28659	0	5	2	1	52.1
Q9Z0V2	0	5	2	2	70.5
O35066	0	3	2	2	89.9
O89084	0	2	1	1	93.5
Q9JL26	0	2	2	1	122
Q8CI71	0	2	1	1	111.1
O70228	0	1	1	1	118.5
Q6Q899	0	2	1	1	105.9
Q08189	0	2	1	1	77.3
Q68FL4	0.002	2	1	1	66.9
O88444	0.001	1	1	1	123.3
Q8VE99	0.001	8	1	1	19.7
Q04736	0.001	3	2	2	60.6
Q8CC88	0.001	1	1	1	213.3
P34152	0.004	1	1	1	123.5
Q61147	0.004	1	1	1	121.1
Q9Z1Q9	0.004	1	1	1	140.1
P08071	0.004	1	1	1	77.8
Q80TL1	0.004	1	1	1	123.2
Q8C3F2	0.004	1	1	1	119.6
Q8VE97	0.005	3	1	1	55.9
Q810U5	0.005	3	1	1	35.3
Q9JHW4	0.005	2	1	1	63.5
Q7TSY6	0.005	2	1	1	51.9
Q3UH60	0.005	1	1	1	171
Q8R4Y8	0.007	0	1	1	248.3
P97798	0.007	1	1	1	163.1
